1 **Predicting Morphological Disparities in Sea Urchin Skeleton Growth and**  
2 **Form**

3 *Maria [Abou Chakra]<sup>1,2,\*</sup>, Miroslav Lovric<sup>3</sup>, and Jonathon Stone<sup>2,4,5</sup>*

4 <sup>1</sup>Max Planck Institute for Evolutionary Biology, Department of Evolutionary  
5 Theory, Plön, SH 24306, Germany. +19059221312, Fax +494522763-260

6 \* Corresponding Author [abouchakra@evolbio.mpg.de](mailto:abouchakra@evolbio.mpg.de)

7 <sup>2</sup>McMaster University, Department of Biology, 1280 Main Street West, Hamilton,  
8 Ontario L8S 4K1, Canada.

9 <sup>3</sup>McMaster University, Mathematics & Statistics Department, 1280 Main Street  
10 West, Hamilton, Ontario L8S 4M1, Canada.

11 <sup>4</sup>McMaster University, Origins Institute, 1280 Main Street West, Hamilton,  
12 Ontario L8S 4M1, Canada.

13 <sup>5</sup>McMaster University, SHARCNet, 1280 Main Street West, Hamilton, Ontario  
14 L8S 4M1, Canada.

15 **Abstract** Sea urchins exhibit among their many species remarkable diversity in  
16 skeleton form (e.g., from spheroid to discoid shapes). However, we still do not  
17 understand how some related species show distinct morphologies despite inherent  
18 similarities at the genetic level. For this, we use theoretical morphology to  
19 disentangle the ontogenic processes that play a role in skeletal growth and form.  
20 We developed a model that simulates these processes involved and predicted  
21 trajectory obtaining 94% and 77% accuracies. We then use the model to

1 understand how morphologies evolved by exploring the individual effects of three  
2 structures (ambulacral column, plate number, and polar regions). These structures  
3 have changed over evolutionary time and trends indicate they may influence  
4 skeleton shape, specifically height-to-diameter ratio, h:d. Our simulations  
5 confirm the trend observed but also show how changes in the attributes affect  
6 shape; we show that widening the ambulacral column or increasing plate number  
7 in columns produces a decrease in h:d (flattening); whereas increasing apical  
8 system radius to column length ratio produces an increase in h:d (gloular shape).  
9 Computer simulated h:d matched h:d measured from real specimens. Our  
10 findings provide the first explanation of how small changes in these structures can  
11 create the diversity in skeletal morphologies.

12

13 **Keywords** Theoretical Morphology, Development, Sea Urchins, Paleontology,  
14 Skeleton, Morphological Disparity

15

## 16 **Introduction**

17 Researchers still puzzle over how some related species show distinct  
18 morphologies despite inherent similarities at the genetic level, the genotypic-  
19 phenotypic paradox. Humans and chimpanzee species, for instance, exhibit  
20 distinct morphologies despite the similarity at gene and protein levels<sup>1</sup>. This  
21 puzzle extends to larger taxonomic groups, such as the echinoderm class

1 Echinoidea, where extremely different skeletal morphologies are manifested from  
2 the same structural attributes.

3 Echinoid skeletons (tests) exhibit pentameric symmetry and the vast  
4 morphological disparity among species can be observed throughout the fossil  
5 record, which dates to the Late Ordovician<sup>2,3</sup>. The earliest sea urchins (Paleozoic  
6 echinoids) exhibited spheroid body forms; however, by the Jurassic, after  
7 members in the Irregularia (sand dollars, sea biscuits, and heart urchins) first  
8 appeared, discoid-shaped, bottle-shaped, and even heart-shaped body forms had  
9 evolved<sup>2-6</sup>. The diversity has elicited equally diverse developmental, evolutionary,  
10 and adaptationist explanations among morphologists<sup>3,5,7-14</sup>. Explaining the  
11 disparity, however, specifically how it is effected during development and  
12 growth, remains challenging. One reason for the persistent challenge resides in  
13 disentangling the 5 underlying ontogenic processes, plate growth, plate addition,  
14 plate interaction, plate gapping, and visceral growth<sup>15</sup>, which are interrelated and  
15 occur simultaneously.

16 All echinoid (sea urchin) tests comprise plates. The plates are produced  
17 and translated within growth zones, the five-fold repeating unit constituting the  
18 pentaradial test<sup>10,12,16</sup>. Each growth zone extends from the aboral surface  
19 (containing the apical system) to the oral surface (containing the peristome).  
20 Plates occupy three regions (Fig. 1): the apical system (comprising genital plates  
21 and ocular plates), corona (comprising ambulacral plates and interambulacral  
22 plates), and peristome (comprising buccal plates). During growth, new plates are

1 added at the apical system and old plates interlock and change size; plates must  
2 separate from one another to increase or decrease in size<sup>11,17-19</sup>.

3 Skeletons exhibit patterns and shapes that can be captured using  
4 elementary principles and mathematical techniques<sup>20,21</sup>. Over the past century, 9  
5 published theoretical models<sup>9,15,20,22-28</sup> have been developed to explain echinoid test  
6 growth<sup>29</sup>. Holotestoid<sup>15161717</sup> is a theoretical computational model that incorporates  
7 the mathematical and physical principles involved in coalescing bubbles, close-  
8 packing circles, and, as developed herein, catenaries to emulate each process  
9 involved in test growth and form. Coalescing bubbles, close-packing circles, and  
10 catenaries are well established as solutions to minimal surface problems<sup>15,30-34</sup> and  
11 are associated with natural patterns<sup>20,35</sup>. We herein use Holotestoid to develop in  
12 silico growth zones. We use the model to show how discoid, adult body forms can  
13 be grown from a spheroid, juvenile body forms. We predict height to diameter  
14 ratios, h:d and compare computer-simulated species-specific h:d to measurements  
15 from real specimens.

## 16 **Materials and Methods**

### 17 Empirical Measurements

18 Specimens of *Eucidaris thouarsii* (n=6) were obtained from the California  
19 Academy of Sciences collection, San Francisco, CA, USA; specimens of *Arbacia*  
20 *punctulata* (n=33) were obtained from Gulf Specimen Marine Laboratory,  
21 Panacea, FL, USA; specimens of *Lytechinus variegatus* (n=70) and *Mellita*  
22 *quinqüesperforata* (n=10) were obtained from the Marine Biological Laboratory,

1 Woods Hole, MA, USA; and specimens of *Dendraster excentricus* (n=49) and  
2 *Strongylocentrotus franciscanus* (n=14) were obtained from Westwind Sealab  
3 Supplies, Victoria, BC, Canada.

4 We chose these 6 morphologically disparate species from the Cidaroida  
5 (i.e., *Eucidaris thouarsii*), Stirodonta (i.e., *Arbacia punctulata*), Camarodonta  
6 (i.e., *Lytechinus variegatus* and *Strongylocentrotus franciscanus*), and Irregularia  
7 (i.e., *Dendraster excentricus* and *Mellita quinquiesperforata*), thus providing a  
8 variety of taxonomic samples. Measurements were performed using a Vernier  
9 calliper and flexible measuring tape on despined, eviscerated, and cleaned tests.  
10 For each specimen, we measured ambulacral column angle, ac, apical system, as,  
11 column length, cl, diameter, d, height, h, and peristome p (Fig. 1a; Table 1).

## 12 **Model**

13 The computational model Holotestoid<sup>15</sup> was designed on principles that capture  
14 growth in regular (i.e., spheroid) sea urchins. The principles emulate  
15 computationally the 5 ontogenic processes (the original code is available in a data  
16 repository<sup>15</sup>).

17 The first process, plate growth, increases or decreases plate size, with plate  
18 size determined on the basis of their location in the growth zone and relative  
19 distance from a polar region (apical system, as, or peristome, p; Fig. 1b).

1           The second process, plate addition, inserts new plates apically at a  
2 nucleation point situated next to an ocular plate. Plates are added sequentially,  
3 alternating between the left and right side adjacent to each ocular plate.

4           The third process, plate interaction, involves an analogy in which  
5 individual plates are likened to bubbles (circles in two-dimensions) to predict the  
6 interfaces and shapes adopted between plates in a column<sup>15,20,22,27,36</sup>.

7           The fourth process, plate gapping, separates plates (circles) in a close-  
8 packing configuration (with no overlaps and minimal gaps), emulating collagen  
9 fibre loosening to create gaps for new plate addition and peripheral calcite  
10 deposition to occur<sup>17</sup>. The computational model arranges unequal-sized circles in  
11 a triangular circle-close-packing configuration to mimic natural gapping.

12           These four processes result in a growth model where plates are added over  
13 time and column length develops according to ambulacra column width (Fig. 1c).  
14 The simulations produce graphically growth zones in two dimensions. However,  
15 since h:d traditionally is used to describe body forms<sup>4,5,7-9,13,14,37</sup>, we now introduce  
16 to Holotestoid the fifth process, visceral growth. This process describes the  
17 integrated effects imparted by somatic growth onto test structures<sup>9,37,38</sup>. In some  
18 previous models, visceral growth was associated with mathematical curves that  
19 describe test outline shapes. The Young-Laplace equation was considered  
20 previously by Thompson<sup>20</sup>, in the liquid drop model, and Ellers<sup>26</sup>, in the  
21 membrane model (the membrane model was successful for some regular  
22 echinoids but was limited in its application, simulating inaccurately outline shapes

1 for tests characterising Cidaroida and Irregularia). We designed the visceral  
2 growth module in the computational model to be flexible enough to implement  
3 any mathematical function that represents reasonably visceral growth (e.g.,  
4 parabolic or hyperbolic); however, we selected curves (catenaries, or catenary  
5 curves) that utilise data extracted easily by measurement, such as  $asr$ ,  $cl$ ,  $pr$ , and  $d$ ,  
6 and are a (closely approximate) consequence of the dynamics of the test growth.

7 Catenaries describe the shape that is assumed by an inextensible but  
8 flexible chain that hangs freely from two fixed points (this shape can model other  
9 objects, such as dental arches<sup>26,43</sup>). A catenary curve models the balance between  
10 two forces in echinoid tests (Fig. S1): the tension between plates and the  
11 horizontal force acting in the outward direction. We analogised each plate as a  
12 separate link in a chain with the tension force pulling plates apart<sup>26,38</sup> – this  
13 analogy is based on the idea that plates can contract and relax, as some are sutured  
14 together<sup>8,13,26</sup>.

15 A catenary curve is represented as a function with the general form:

16 
$$y = a \cosh(x / a) \tag{1}$$

17 with  $(0, a)$  as its lowest point (Fig. 1d). In the model,  $x$  represents height ( $h$ ) and  
18 is given by  $h = h_1 + h_2$ . When  $x = h_1$ , then  $y = a + d / 2 - asr$  and thus equation  
19 (1) implies that

20 
$$a + d / 2 - asr = a \cosh(h_1 / a).$$

21 Likewise, when  $x = -h_2$ , then  $y = a + d / 2 - pr$ , and equation (1) implies that

1 
$$a + d / 2 - pr = a \cosh (- h_2 / a) = a \cosh (h_2 / a).$$

2 We solve this system of three equations for  $a$ ,  $h_1$  and  $h_2$ , using numeric methods.

3 Calculating the value for  $a$  needed in equation (1) requires knowing test height,  $h$ ,

4 ambitus diameter,  $d$ , apical system radius,  $asr$ , and peristome system radius,  $pr$

5 (Fig 1). As described previously, the first four processes involve values for  $asr$ ,

6  $pr$ , and  $cl$ . We lack a predictor for diameter,  $d$ ; thus, we need to use  $cl$  to estimate

7 test height,

8 
$$h = \alpha cl (h:d), \quad (2)$$

9 where  $h:d$  is taken as a parameter and  $d = \alpha cl$ , where  $\alpha$  is a constant. In the

10 model, we combined equations (1) and (2) to predict test shape by determining the

11 constant  $a$  in equation (1) (Fig. 1d). We created a function that cycles through a

12 range of possible  $h:d$  ratios (from 0.1 to 0.9, in 0.0001-step increments),

13 predicting curvature for each incremental value. As is the case with applying any

14 function, suitable justification is required; we therefore validated model

15 predictions with measurements taken from real specimens.

16 Theoretically, two extreme morphologies may be realized as column

17 length increases in the limit to infinity, extremely flattened tests or extremely

18 domed tests. Based on the 6 species measured (Table 1), typically  $h:d < 1$ .

19 Although  $h:d > 1$  theoretically is possible, our empirical data revealed that the

20 average  $d:cl$  is  $1.0 \pm 0.1$  for all species (Table 1, Fig S2). As column length

21 increases, diameter increases under a fixed  $d:cl$  constraint, thus restricting tests to



1  $h:d < 1$ . This assumption can be relaxed in the future, but for now it provides a  
2 straightforward transition between 2-dimensional and 3-dimensional perspectives.

3 The visceral module requires 3 parameters: column length,  $cl$ , apical  
4 system radius,  $asr$ , and peristome radius,  $pr$ , to predict test height,  $h$ . Values for  
5 these can be extracted from the model or measured from real specimens. We used  
6 all the measured attributes (Table 1) as parameters and compared measured  $d$  and  
7  $h$  with values predicted from the module, obtaining 94% and 77% accuracies (Fig.  
8 S2). This confirms that catenaries can be used to predict accurately  $h:d$  for regular  
9 echinoids. We then combined the visceral growth module with the computational  
10 model, Holotestoid.

## 11 Simulations

12 Combining the 5 processes, we simulated sea urchin growth zones with 6  
13 parameters: growth zone angle ( $gz$ , Fig. 1a), ambulacral column angle ( $ac$ , Fig.  
14 1a), total ambulacral plate number ( $tpn$ ), apical system radius ( $asr$ , Fig. 1b),  
15 peristome-to-apical system ratio ( $p:as$ ), and apical system-to-column length ratio  
16 ( $asr:cl$ ). The  $p:as$  and  $asr:cl$  are maintained throughout each simulation unless  
17  $asr:cl=0$ , which entails that polar region sizes remain fixed while columns grew.

18 Parameter value ranges for all simulations were chosen to encompass  
19 measured data for real specimens (Table 1). We assumed that growth zones were  
20 equivalent in arc length, so growth zone angle was fixed,  $gz = 72^\circ$ , and initial  
21 apical system diameter was set arbitrarily at 1 mm.

## 1 Results and Discussion

2 Simulations to predict species specific h:d were conducted using  
3 parameter ranges encompassing measured data from real specimens (Table1). We  
4 measured ambitus diameter, d, test height, h, and column length, cl, from 6  
5 disparate species (Table 1): 4 regular (i.e., *Eucidaris thouarsii*, *Arbacia*  
6 *punctulata*, *Lytechinus variegatus* and *Strongylocentrotus franciscanus*) and 2  
7 irregular (i.e., *Dendraster excentricus* and *Mellita quinquesperforata*). The  
8 simulated developmental trajectories for each species spanned from the juvenile  
9 stage to an adult stage. For each new plate addition and thus skeleton growth  
10 increment, the model predicted a h:d value. For each simulated representative for  
11 a particular species, reasonable h:d (Fig. 2), within the measured range, were  
12 predicted: the *E. thouarsii* representative h:d reached  $0.63 \pm 0.03$ , which falls  
13 within measured h:d range  $0.57 \pm 0.05$  (Fig. 2a). The *A. punctulata* representative  
14 h:d reached  $0.56 \pm 0.04$ , which falls within measured h:d range  $0.53 \pm 0.03$  (Fig.  
15 2b). The *L. variegatus* representative h:d reached  $0.59 \pm 0.07$ , which falls within  
16 measured h:d range  $0.60 \pm 0.05$  (Fig. 3c). The *S. franciscanus* representative h:d  
17 reached  $0.45 \pm 0.05$ , which falls within measured h:d range  $0.44 \pm 0.05$  (Fig. 3d).  
18 The *M. quinquesperforata* representative h:d reached  $0.14 \pm 0.02$ , close to the  
19 measured h:d range  $0.10 \pm 0.01$  (Fig. 3e). And the *D. excentricus* representative  
20 h:d reached  $0.15 \pm 0.02$ , which falls within measured h:d range  $0.12 \pm 0.01$  (Fig.  
21 3f).

1           We explored effects from the structural attributes ambulacral column  
2 width, total plate number, and polar region sizes (apical system radius and  
3 peristome radius) on h:d. Simulations reveal that increasing ambulacral column  
4 angle,  $am$ , from  $10^\circ$  to  $64^\circ$  decreases h:d from 0.99 to 0.1 (Fig. 3a). This shows  
5 that increasing ambulacra column width can lead to flattened tests, which is  
6 consistent with morphological observations across the post-Palaeozoic record<sup>4</sup>.

7           Similar effects were observed when total plate number was varied.  
8 Simulations revealed that increasing total plate number decreases h:d from 0.99 to  
9 0.16 (Fig. 2b). This entails that changes in plate number can influence overall test  
10 shape – increasing  $tpn$  can lead to flattened tests. Increasing column angle and  
11 plate number can impart compounding effects; for example, the flattening rate  
12 changed: for  $ac=12^\circ$ , h:d started to decrease at  $tpn=44$ , whereas, for  $ac=60^\circ$ , h:d  
13 started to decrease at  $tpn=8$  (Fig. 3b). We also observed that, for all  $am$ ,  $tpn < 10$   
14 always produced  $h:d > 0.9$ , suggesting a possible explanation for the test shape  
15 similarity observed across newly metamorphosed juveniles<sup>17-19,39</sup>, which comprise  
16 a small plate number and are characterized by spheroid shapes.

17           Contrastingly, simulations showed that apical system and peristome sizes,  
18 themselves, have no affect on test h:d. Increasing  $ap$  from 0.05 to 50 produced no  
19 change in h:d, which remained constant at 0.16; increasing  $ps:ap$  from 0.5 to 2  
20 similarly produced no net effect on h:d (Fig. 2c). On the basis of these results, we  
21 infer that, under particular conditions (*e.g.*, no growth in the polar regions), h:d is

1 impacted by the structural attributes ambulacral column width and plate number  
2 rather than polar region sizes.

3 Computer simulations revealed that increasing  $asr:cl$  from 0 to 0.6  
4 increased  $h:d$  from 0.37 to 0.99 (Fig. 2d, black curve). The  $asr:cl$  imparted greater  
5 influence on columns produced by large  $am$  (Fig. 2d, black curve) compared to  
6 small  $am$  (Fig. 2d, grey curve). From these results, we infer that test  $h:d$  is  
7 influenced by multiple, even simultaneous, changes among the structural  
8 attributes ambulacral column width, plate number, and polar region sizes.

## 9 **Conclusion**

10 We present and validate a model that simulates growth zones in sea urchins. We  
11 used the model to explore how morphological diversity can be achieved across  
12 echinoid groups by changing growth trajectories. We explore how changes to  
13 particular structural attributes can produce discoid from spheroid body forms. Our  
14 results provide an explanation for how different  $h:d$  are achieved in different  
15 major echinoid groups and furthermore show how those  $h:d$  may be realized  
16 throughout development in individuals. Researchers historically have noted that  
17 adult  $h:d$  is species-specific<sup>4,7,24,40</sup>. This is the first study to show how such  $h:d$   
18 may be sustained through balanced growth among the structural attributes  
19 comprising tests (ambulacral column width, total plate number, polar region  
20 sizes). Our results also suggest a possible explanation for the test shape similarity  
21 observed across newly metamorphosed juveniles<sup>17-19,39</sup>.

1           This study provides an explanation for how the disparity observed  
2 between regular echinoids (*e.g.*, sea urchins) and irregular echinoids (*e.g.*, sand  
3 dollars) evolved. We infer that flattened tests were effected by increases in the  
4 ambulacral column width and decreases in apical system radius to column length  
5 ratio and peristome radius to column length ratio in irregular echinoids in  
6 comparison to regular echinoids. Although this study involved only 6 species, the  
7 findings constitute an essential step toward understanding morphological diversity  
8 seem across echinoid taxa. The next step would be to expand the analysis to more  
9 species. Increasing the predictive accuracy of the model may prove valuable to  
10 the unresolved origin of the ancestral shape which is a single fossil specimen  
11 <sup>2,3,27,40-42</sup>.

12

### 13 **References**

- 14 1       King, M.-C. & Wilson, A. C. Evolution at two levels in humans and  
15       chimpanzees. *Science* **188**, 107-116 (1975).  
16 2       Kier, P. M. Evolutionary trends in paleozoic echinoids. *Journal of*  
17       *Paleontology* **39**, 436-465 (1965).  
18 3       Smith, A. B. in *Evolving Form and Function; Fossils and Development*  
19       (eds D. E. G. Briggs & A. Seilacher) 181-195 (Yale Peabody Museum  
20       Publications, 2005).  
21 4       Kier, P. M. Evolutionary trends and their functional significance in the  
22       post-Paleozoic echinoids. *Memoir (The Paleontological Society)* **5**, 1-95  
23       (1974).  
24 5       Smith, A. B. *Echinoid Palaeobiology*. (Allen & Unwin, 1984).  
25 6       Saucède, T., Mooi, R. & David, B. Phylogeny and origin of Jurassic  
26       irregular echinoids (Echinodermata: Echinoidea). *Geological Magazine*  
27       **144**, 333-359, doi:doi:10.1017/S0016756806003001 (2007).  
28 7       Ebert, T. A. Allometry, design and constraint of body components and of  
29       shape in sea urchins. *Journal of Natural History* **22**, 1407-1425 (1988).

- 1 8 Pearse, J. S. & Pearse, V. B. Growth zones in the echinoid skeleton.  
2 *American Zoologist* **15**, 731-753 (1975).
- 3 9 Moss, M. L. & Meehan, M. Growth of the echinoid test. *Acta Anatomica*  
4 **69**, 409-444 (1968).
- 5 10 Mooi, R. & David, B. What a new model of skeletal homologies tells us  
6 about asteroid evolution. *American Zoologist* **40**, 326-339 (2000).
- 7 11 Johnson, A. S., Ellers, O., Lemire, J., Minor, M. & Leddy, H. A. Sutural  
8 loosening and skeletal flexibility during growth: determination of drop-  
9 like shapes in sea urchins. *Proceedings of the Royal Society of London*  
10 *Series B-Biological Sciences* **269**, 215-220 (2002).
- 11 12 Hotchkiss, F. H. C. A "rays-as-appendages" model for the origin of  
12 pentamerism in echinoderms. *Paleobiology* **24**, 200-214 (1998).
- 13 13 Ebert, T. A. & Russell, M. P. Allometry and Model-Ii Nonlinear-  
14 Regression. *J Theor Biol* **168**, 367-372 (1994).
- 15 14 Russell, M. P., Ebert, T. A. & Petraitis, P. S. Field estimates of growth and  
16 mortality of the green sea urchin, *Strongylocentrotus droebachiensis*.  
17 *Ophelia* **48**, 137-153 (1998).
- 18 15 Abou Chakra, M. & Stone, J. R. Holotestoid: A computational model for  
19 testing hypotheses about echinoid skeleton form and growth. *J Theor Biol*  
20 **285**, 113-125, doi:Doi 10.1016/J.Jtbi.2011.06.019 (2011a).
- 21 16 Mooi, R., David, B. & Wray, G. A. Arrays in rays: terminal addition in  
22 echinoderms and its correlation with gene expression. *Evolution and*  
23 *Development* **7**, 542-555 (2005).
- 24 17 Gordon, I. The development of the calcareous test of *Echinus miliaris*.  
25 *Philosophical Transactions of the Royal Society of London. Series B,*  
26 *Containing Papers of Biological Character* **214**, 259-312 (1926).
- 27 18 Gordon, I. The development of the calcareous test of *Echinocardium*  
28 *cordatum*. *Philosophical Transactions of the Royal Society of London.*  
29 *Series B, Containing Papers of Biological Character* **215**, 255-313 (1927).
- 30 19 Gordon, I. Skeletal development in *Arbacia*, *Echinarachnius*, and  
31 *Leptasterias*. *Philosophical Transactions of the Royal Society of London.*  
32 *Series B, Containing Papers of Biological Character* **217**, 289-334 (1929).
- 33 20 Thompson, D. A. W. *On Growth and Form*. An abridged edn, (Press  
34 Syndicate of the University of Cambridge, 1917).
- 35 21 Ball, P. *The self-made tapestry : pattern formation in nature*. (Oxford  
36 University Press, 1999).
- 37 22 Raup, D. M. Theoretical morphology of echinoid growth. *Journal of*  
38 *Paleontology* **42**, 50-63 (1968).
- 39 23 Seilacher, A. Constructional morphology of sand dollars. *Paleobiology* **5**,  
40 191-221 (1979).
- 41 24 Telford, M. Domes, arches and urchins: the skeletal architecture of  
42 echinoids (Echinodermata). *Zoomorphology* **105**, 114-124 (1985).

- 1 25 Baron, C. J. *The Structural Mechanics and Morphogenesis of Extant*  
2 *Regular Echinoids Having Rigid Tests*. Ph.D. thesis. Vol. Doctor of  
3 Philosophy 285 (University of California at Berkeley, 1991).
- 4 26 Ellers, O. A mechanical model of growth in regular sea urchins:  
5 predictions of shape and a developmental morphospace. *Proceedings of*  
6 *the Royal Society of London Series B-Biological Sciences* **254**, 123-129  
7 (1993).
- 8 27 Abou Chakra, M. & Stone, J. R. in *WIT Transactions on Ecology and the*  
9 *Environment WIT Transactions on Ecology and the Environment : 114*  
10 (ed C. A. Brebbia) 97-105 (WIT Press, 2008).
- 11 28 Zachos, L. G. A new computational growth model for sea urchin  
12 skeletons. *J Theor Biol* **259**, 646-657, doi:[10.1016/j.jtbi.2009.04.007](https://doi.org/10.1016/j.jtbi.2009.04.007)  
13 (2009).
- 14 29 Abou Chakra, M. & Stone, J. R. Classifying echinoid skeleton models:  
15 testing ideas about growth and form. *Paleobiology* **37**, 686-695 (2011b).
- 16 30 Bernoulli, J. Solutio problematis funicularii. *Acta Eruditorum*, 274-276  
17 (1691).
- 18 31 Yates, R. C. The catenary and the tractrix. *The American Mathematical*  
19 *Monthly* **66**, 500-505 (1959).
- 20 32 Coxeter, H. S. M. *Introduction To Geometry*. 2nd edn, (Wiley, 1969).
- 21 33 Isenberg, C. *The Science of Soap Films and Soap Bubbles*. (Tieto Ltd.,  
22 1978).
- 23 34 Aste, T. Circle, sphere, and drop packings. *Physical Review E* **53**, 2571-  
24 2579 (1996).
- 25 35 Aste, T. & Weaire, D. L. *The Pursuit of Perfect Packing*. (Institute of  
26 Physics Publication, 2000).
- 27 36 Boys, S. C. V. *Soap Bubbles their Colors and Forces which Mold them*.  
28 156 (Doubleday Anchor Books, 1958).
- 29 37 Deutler, F. Über das Wachstum des Seeigelskeletts. *Zoologische*  
30 *Jahrbücher. Abteilung für Anatomie und Ontogenie der Tiere* **48**, 119-200  
31 (1926).
- 32 38 Ellers, O. & Telford, M. Causes and consequences of fluctuating coelomic  
33 pressure in sea urchins. *Biological Bulletin* **182**, 424-434 (1992).
- 34 39 Emlet, R. B. Morphological Evolution of Newly Metamorphosed Sea  
35 Urchins-A Phylogenetic and Functional Analysis. *Integr Comp Biol* **50**,  
36 571-588, doi:Doi 10.1093/Icb/Icq073 (2010).
- 37 40 Mortensen, T. *A monograph of the Echinoidea, Bothriocidaroida,*  
38 *Melonechinoida, Lepidocentroida, and Stirodonta*. Vol. Vol. 2 (C. A.  
39 Reitzel, 1935).
- 40 41 Jackson, R. T. *Phylogeny of the Echini, with a Revision of Palaeozoic*  
41 *Species*. Vol. Vol. 7 1-490 (1912).
- 42 42 Durham, J. W. & Melville, R. V. A classification of echinoids. *Journal of*  
43 *Paleontology* **31**, 242-272 (1957).

1 **Acknowledgments** We thank, F. H. C. Hotchkiss, G. J. Vermeij, K. R.  
2 Moonoosawmy, M. Huntley, B. Evans, B. Golding, and R. Mooi for comments on  
3 earlier versions of the manuscript. The Ontario Ministry of Training, Colleges,  
4 and Services and Natural Sciences and Engineering Research Council of Canada  
5 (Discovery Grant 261590) for financial support. MAC also thanks N. Abou  
6 Chakra, Arne Traulsen, and the Max Planck Society for their help and support.

7 **Authors Contributions Statement** MAC devised and developed the model,  
8 wrote the program, analysed the results and created the cdf module (available  
9 upon request). MAC measured specimens and analysed the results. ML conducted  
10 the analytical solution. MAC, ML, and JS contributed to the conceptualization of  
11 the catenary model. All authors reviewed the manuscript.

12 **Competing Financial Interest** MAC, ML, and JS declare no conflict of interest.

13

14

15

16

17

18



## 1 **Figure and Tables Legends**

2 TABLE 1.-- *E. thouarsii* (Et), *A. punctulata* (Ap), *L. variegatus* (Lv), *S.*  
3 *franciscanus* (Sf), *M. quinquiesperforata* (Mq), and *D. excentricus* (De)  
4 measurements; ambulacral column angle (ac), apical system radius (asr), column  
5 length (cl), test diameter (d), test height (h), and peristome radius (pr).  
6 Measurements are presented as ac , asr:cl, pr:asr, d:cl, and h:d  $\pm$  standard error.

7

|    | ac angle    | asr:cl          | pr:asr          | d:cl            | h:d             |
|----|-------------|-----------------|-----------------|-----------------|-----------------|
| Et | 15° $\pm$ 1 | 0.18 $\pm$ 0.02 | 1.33 $\pm$ 0.24 | 1.00 $\pm$ 0.07 | 0.57 $\pm$ 0.05 |
| Ap | 20° $\pm$ 2 | 0.14 $\pm$ 0.01 | 1.97 $\pm$ 0.21 | 1.10 $\pm$ 0.05 | 0.53 $\pm$ 0.03 |
| Lv | 27° $\pm$ 2 | 0.08 $\pm$ 0.02 | 1.77 $\pm$ 0.17 | 0.98 $\pm$ 0.22 | 0.60 $\pm$ 0.05 |
| Sf | 31° $\pm$ 3 | 0.09 $\pm$ 0.01 | 1.86 $\pm$ 0.16 | 1.02 $\pm$ 0.08 | 0.44 $\pm$ 0.05 |
| Mq | 39° $\pm$ 3 | 0.04 $\pm$ 0.01 | 0.53 $\pm$ 0.06 | 1.07 $\pm$ 0.04 | 0.10 $\pm$ 0.01 |
| De | 41° $\pm$ 3 | 0.03 $\pm$ 0.01 | 0.84 $\pm$ 0.10 | 1.03 $\pm$ 0.16 | 0.15 $\pm$ 0.02 |

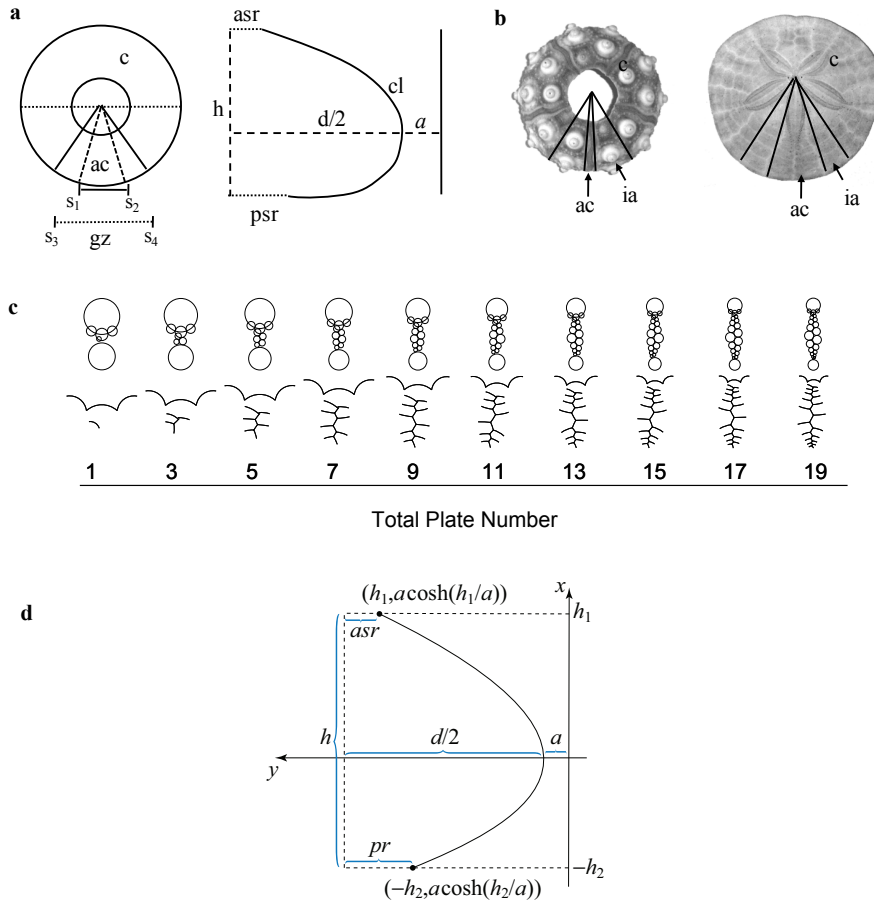

1  
2 Figure 1. Schematic representation for an echinoid test. a) structural attributes:  
3 corona, c, ambulacral column, ac (measured as the angle spanning line segment  
4  $s_1$ - $s_2$ ), growth zone, gz (measured as the angle spanning line segment  $s_3$ - $s_4$ ), apical  
5 system radius, asr, column length, cl, ambitus diameter, d, peristome radius, pr,  
6 interambulacral column, ia, and test height, h. b) aboral surface for *Eucidaris*  
7 *thouarsii* (left) and *Dendraster excentricus* (right), displaying the size difference  
8 between the columns (am and ia) within a growth zone. c) Simulating the growth  
9 of an ambulacral column shown over time as new plates are added. Parameters  
10 used  $ac=40^\circ$ ,  $as=0.015\text{mm}$ ,  $tpn=20$ ,  $p:as=0.75$ , and  $asr:cl=0.25$  d) Relationship  
11 between catenary curve and echinoid test, apical system radius and peristome

- 1 radius, height ( $= h_1 + h_2$ ), ambitus diameter to predict  $a$  using  $a + d/2 - asr = a$
- 2  $\cosh(h_1/a)$  and  $a + d/2 - p = a \cosh(h_2/a)$ .

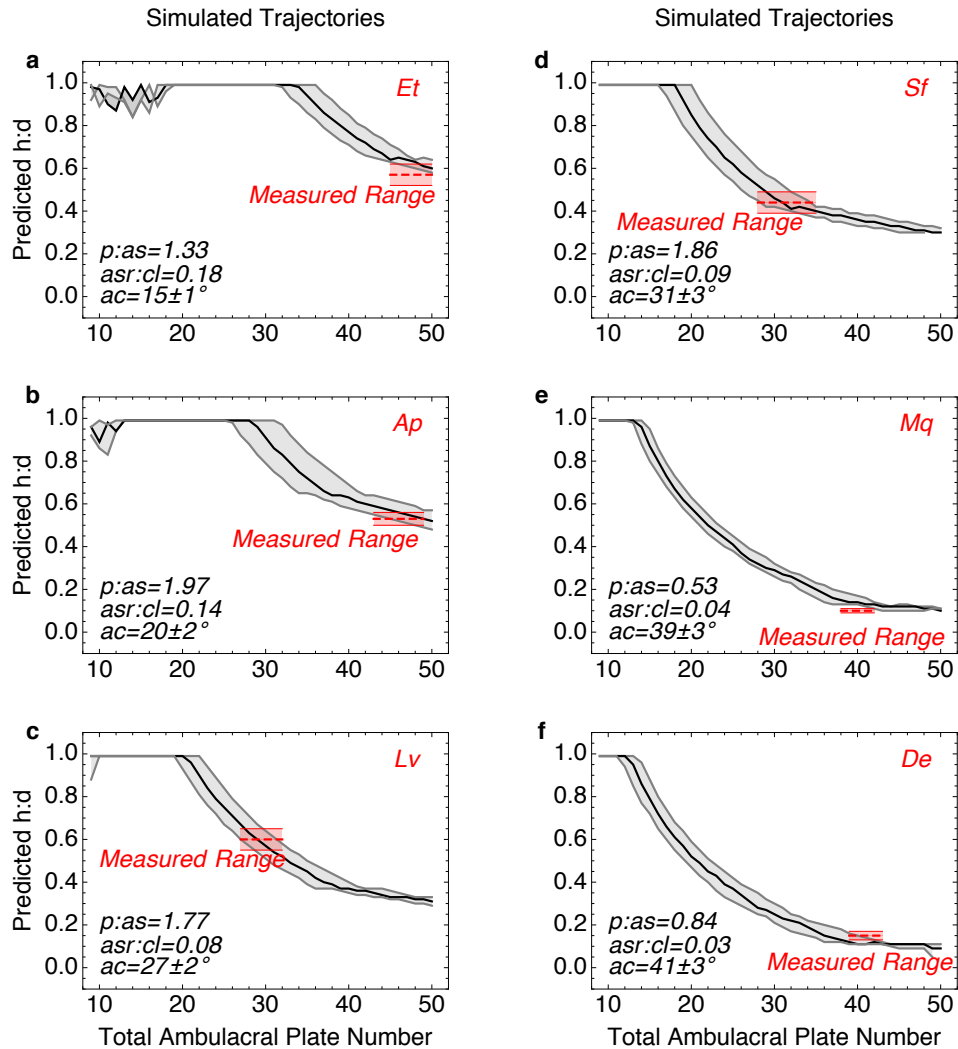

3  
4 Figure 2. Simulations of growth trajectories for using species specific parameters.  
5 We impose measured range for height to diameter ratio, h:d (dashed red line),  
6 from real specimens onto and the predicted h:d (gray curves and black curves).  
7 We used the parameter values measured from representative specimens from six  
8 species (Table 1): a) *E. thouarsii* (*Et*), b) *A. punctulata* (*Ap*), c) *L. variegatus*

- 1 (Lv), d) *S. franciscanus* (Sf), e) *M. quinquiesperforata* (Mq), f) *D. excentricus*  
 2 (De). General parameters used  $ap=0.015\text{mm}$ ,  $tpn=50$ ,  $gz=72^\circ$ ,

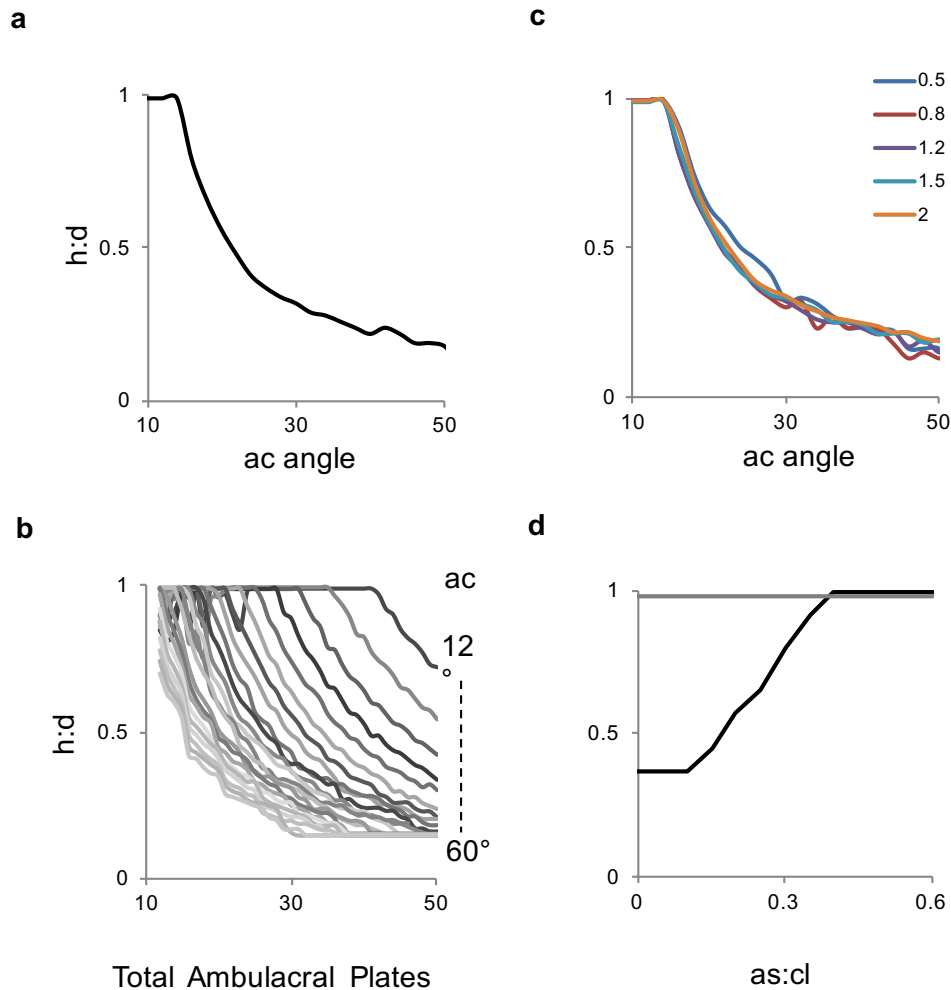

3  
 4 Figure 3. Simulation predicting effects on height to diameter ratio,  $h:d$ , with  
 5 respect to a)  $am$ : an increase caused  $h:d$  to decrease; b) as total ambulacral plate  
 6 number,  $tpn$ , in a column increased to 50 the  $h:d$  decreased, with trends shown as  
 7  $am$  increased from  $12^\circ$  to  $60^\circ$ . c) The persitome to apical system,  $p:as$ , ratio values  
 8 0.5, 0.8, 1, 1.2, 1.5, and 2 imparted no effect on  $h:d$  (all six curves overlapped and  
 9 exhibited the same trend as in a); d) An increase in the apical system to column

1 length,  $ap:cl$ , ratio caused an increase in  $h:d$ , for instance a simulation with a wide  
2 ambulacral column,  $am=40^\circ$  (black curve), started of flat, low  $h:d$  ratio and  
3 increase as  $ap:cl$  also increase. However tests with a thin ambulacral column,  $am$   
4  $= 8^\circ$  already were spheroidal and couldn't increase any further in  $h:d$  (grey curve).  
5 Parameters values used unless stated explicitly were  $asr = 0.05\text{mm}$ ,  $tpn = 25 / 50$ ,  
6  $p:as = 1$ , and  $asr:cl = 0$ .

7

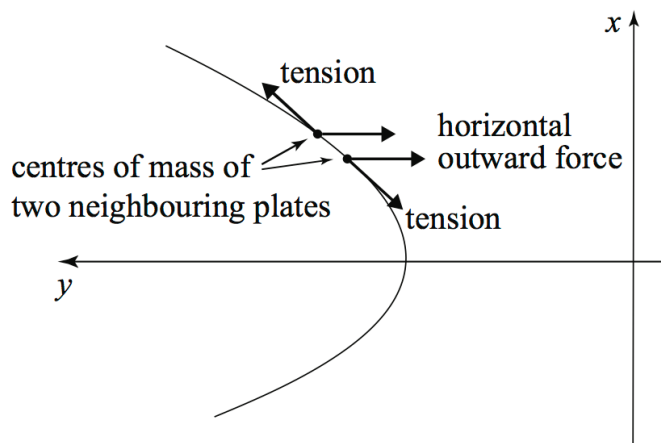

8

9 Figure S1 A diagram showing forces acting on a test: the tension force pulling  
10 apart neighbouring plates, and the outward-facing horizontal force, which  
11 approximately balances all other forces present.

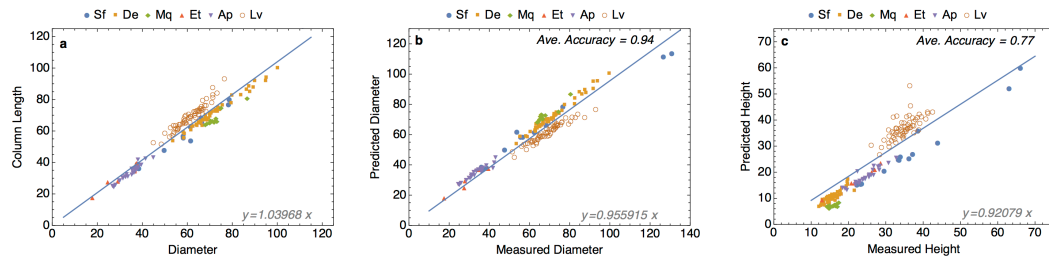

1  
 2 Figure S2. Data for specimens representing echinoid taxa: *S. franciscanus* (Sf), *D.*  
 3 *excentricus* (De), *M. quinquesperforata* (Mq), *E. thouarsii* (Et) *A. punctulata*  
 4 (Ap), and *L. variegatus* (Lv). a) Measured column length vs measured diameter.  
 5 b) Measured versus predicted diameter values. c) Measured versus predicted  
 6 height values. Measurements are millimetres.

7
